# Supplementary figures and images for: Measuring the Rheological and Textural Properties of Thick Purees Used to Manage Patients with Swallowing Disorders
Source: MDPI journal article supplement (doi:10.3390/nu15173767), 2023-08-28

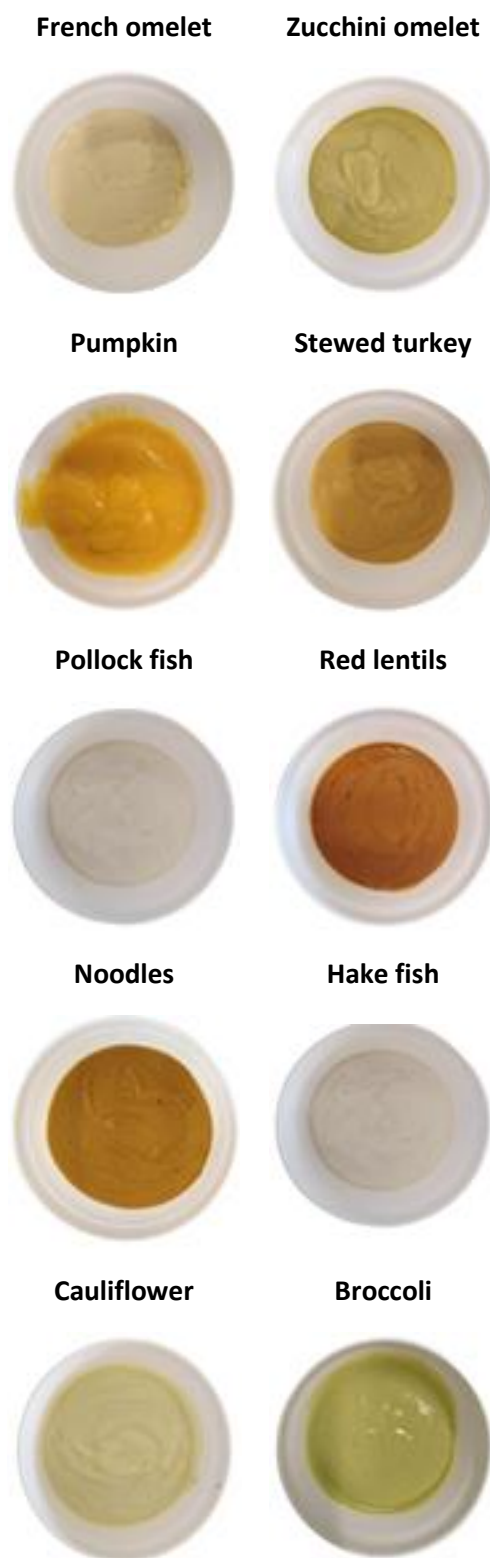

**Figure S1.** Selected Mediterranean thick puree for the study.

Supplement: s1 [file s1]
